# Supplementary material
Source: Springer Nature journal article supplement (https://www.springermedizin.de/resource/supplementary/12885_2009_1525_MOESM3_ESM.pdf/9472236)

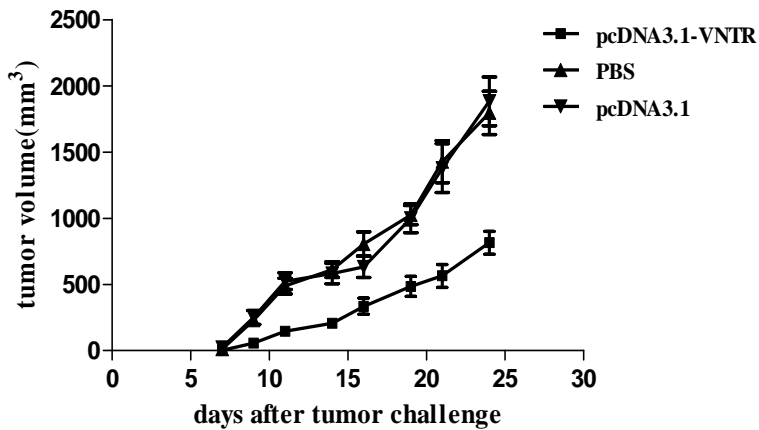

A

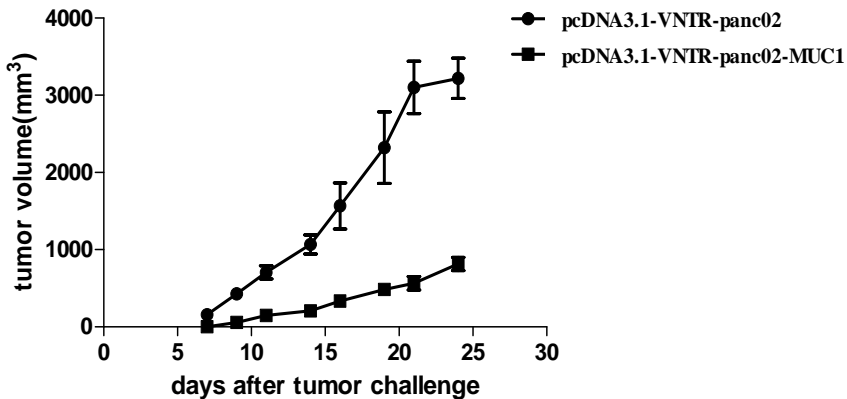

B

Supplement: MOESM3 [file 9472236]
